# Supplementary material
Source: PubMed Central journal article supplement (PMC4891213)
Supplement: supp_WNL.0000000000002719_Table_e-1.pdf [file supp_WNL.0000000000002719_Table_e-1.pdf]

**Table e-1.** Association of seafood and energy adjusted long-chain (EPA + DHA) n-3 fatty acids and  $\alpha$ -linolenic acid (18:3 n-3) with annual rate of change in global cognitive score and in five cognitive domain scores among 632 MAP participants who were *APOE*- $\epsilon$ 4 negative based on multiple-adjusted linear mixed models including primary confounders<sup>a</sup>, 2004-2013

| <b>Model</b>             |           | <b>Global<br/>Cognitive<br/><math>\beta</math><br/>(p-value)</b> | <b>Episodic<br/>Memory<br/><math>\beta</math><br/>(p-value)</b> | <b>Semantic<br/>Memory<br/><math>\beta</math><br/>(p-value)</b> | <b>Working<br/>Memory<br/><math>\beta</math><br/>(p-value)</b> | <b>Visual<br/>Spatial<br/><math>\beta</math><br/>(p-value)</b> | <b>Perceptual<br/>Speed<br/><math>\beta</math><br/>(p-value)</b> |
|--------------------------|-----------|------------------------------------------------------------------|-----------------------------------------------------------------|-----------------------------------------------------------------|----------------------------------------------------------------|----------------------------------------------------------------|------------------------------------------------------------------|
| <b>Median<br/>Number</b> |           |                                                                  |                                                                 |                                                                 |                                                                |                                                                |                                                                  |
| <b>Seafood meals</b>     | <1/wk     | 0.5                                                              | Referent                                                        | Referent                                                        | Referent                                                       | Referent                                                       | Referent                                                         |
|                          | 1+wk      | 2.0                                                              | 0.008                                                           | -0.001                                                          | 0.004                                                          | 0.017                                                          | 0.006                                                            |
|                          | (p-value) |                                                                  | (0.48)                                                          | (0.91)                                                          | (0.73)                                                         | (0.14)                                                         | (0.60)                                                           |
| <b>Median<br/>g/d</b>    |           |                                                                  |                                                                 |                                                                 |                                                                |                                                                |                                                                  |

**Long-chain n-3 fatty acids**

|                          |      |                  |                  |                  |                  |                  |                  |
|--------------------------|------|------------------|------------------|------------------|------------------|------------------|------------------|
| Tertile 1                | 0.02 | Referent         | Referent         | Referent         | Referent         | Referent         | Referent         |
| Tertile 2                | 0.07 | -0.009<br>(0.40) | -0.007<br>(0.56) | -0.018<br>(0.12) | -0.003<br>(0.80) | -0.012<br>(0.29) | -0.005<br>(0.67) |
| Tertile 3                | 0.22 | 0.005<br>(0.65)  | 0.004<br>(0.76)  | -0.001<br>(0.96) | 0.014<br>(0.21)  | -0.011<br>(0.34) | 0.003<br>(0.79)  |
| P-value for linear trend |      | 0.47             | 0.62             | 0.71             | 0.15             | 0.45             | 0.36             |

 **$\alpha$ -linolenic acid**

|           |      |                 |                 |                  |                 |                 |                 |
|-----------|------|-----------------|-----------------|------------------|-----------------|-----------------|-----------------|
| Tertile 1 | 0.75 | Referent        | Referent        | Referent         | Referent        | Referent        | Referent        |
| Tertile 2 | 0.98 | 0.002<br>(0.86) | 0.011<br>(0.34) | 0.002<br>(0.86)  | 0.005<br>(0.61) | 0.011<br>(0.32) | 0.004<br>(0.68) |
| Tertile 3 | 1.23 | 0.001<br>(0.89) | 0.012<br>(0.35) | -0.008<br>(0.51) | 0.001<br>(0.93) | 0.005<br>(0.67) | 0.009<br>(0.38) |

---

|                          |      |      |      |      |      |      |
|--------------------------|------|------|------|------|------|------|
| P-value for linear trend | 0.89 | 0.35 | 0.52 | 0.94 | 0.70 | 0.38 |
|--------------------------|------|------|------|------|------|------|

---

<sup>a</sup> Models are adjusted for age, sex, education, participation in cognitive activities, energy intake (seafood only), physical activity, alcohol consumption, smoking, time, and time interactions with each model covariate.
